# Supplementary material for: Solvation of the Boc–Val–Phe–nPr peptide characterized by VCD spectroscopy and DFT calculations
Source: Royal Society of Chemistry journal article supplement (doi:10.1039/d1cp05457k), 2022-01-01
Supplement: d1cp05457k1.pdf [file d1cp05457k1.pdf]

Supporting information for

# Solvation of the Boc-Val-Phe-*n*Pr peptide characterized by VCD spectroscopy and DFT calculations

Kevin Scholten,<sup>a</sup> Christian Merten<sup>a,\*</sup>

<sup>a)</sup> Ruhr Universität Bochum  
Fakultät für Chemie und Biochemie, Organische Chemie II  
Universitätsstraße 150  
44801 Bochum, Germany  
christian.merten@ruhr-uni-bochum.de  
www.mertenlab.de

# 1. Conformational analysis

**Table S1.** Conformations and relative energies of LL-2 obtained at B3LYP/6-31G+(2d,p)/IEFPCM(CHCl<sub>3</sub>) level of theory. Relative zero-point corrected and Gibbs Free energies,  $\Delta E_{ZPC}$  and  $\Delta G_{298K}$ , are given in kcal/mol and the corresponding Boltzmann weights  $\chi$  in percentage.

|        | Val $\phi$ | Val $\psi$ | Phe $\phi$ | Phe $\psi$ | Val-Side<br>N-C <sup><math>\alpha</math></sup> -C(H)-C(H <sub>3</sub> ) | Phe Side<br>N-C <sup><math>\alpha</math></sup> -C(H <sub>2</sub> )-C <sub>Ar</sub> | Boc  | $\Delta E_{ZPC}$ | $\Delta G_{298K}$ | $\chi(\Delta E)$ | $\chi(\Delta G)$ |
|--------|------------|------------|------------|------------|-------------------------------------------------------------------------|------------------------------------------------------------------------------------|------|------------------|-------------------|------------------|------------------|
| (γ,β)  | 79.0       | -58.5      | -144.1     | 157.7      | -174.6                                                                  | 67.2                                                                               | T    | 5.32             | 7.18              | 0.00             | 0.00             |
|        | 84.0       | -60.0      | -145.4     | 157.4      | -144.9                                                                  | 65.9                                                                               | C    | 7.71             | 10.22             | 0.00             | 0.00             |
|        | 77.1       | -59.7      | -114.5     | 113.9      | -178.2                                                                  | -173.6                                                                             | T    | 3.06             | 4.03              | 0.07             | 0.04             |
|        | 82.3       | -59.9      | -147.4     | 134.4      | -145.4                                                                  | -174.4                                                                             | C    | 5.75             | 7.28              | 0.00             | 0.00             |
|        | 64.2       | -24.9      | -137.2     | 157.2      | -56.1                                                                   | 67.9                                                                               | T    | 8.46             | 10.28             | 0.00             | 0.00             |
|        | 73.8       | -31.0      | -153.9     | 160.2      | -34.0                                                                   | 62.4                                                                               | C    | 12.04            | 15.45             | 0.00             | 0.00             |
|        | 64.6       | -31.4      | -120.6     | 117.8      | -55.5                                                                   | -174.5                                                                             | T    | 5.75             | 6.23              | 0.00             | 0.00             |
|        | 64.4       | -25.9      | -139.8     | 156.8      | -55.9                                                                   | 69.8                                                                               | T    | 8.52             | 10.86             | 0.00             | 0.00             |
| (γ,γ') | 62.8       | -55.5      | -85.0      | 54.9       | 70.7                                                                    | 46.5                                                                               | T    | 9.70             | 12.90             | 0.00             | 0.00             |
|        | 66.5       | -42.9      | -84.6      | 83.3       | 80.9                                                                    | -166.3                                                                             | T    | 6.39             | 7.92              | 0.00             | 0.00             |
|        | 89.0       | -6.1       | -85.0      | 84.8       | 153.7                                                                   | -166.4                                                                             | C    | 10.35            | 12.24             | 0.00             | 0.00             |
|        | 64.2       | -44.6      | -82.8      | 74.0       | 74.4                                                                    | -67.0                                                                              | T    | 6.40             | 7.83              | 0.00             | 0.00             |
|        | 63.5       | -47.8      | -85.8      | 58.0       | -58.5                                                                   | 44.4                                                                               | T    | 9.01             | 11.54             | 0.00             | 0.00             |
|        | 63.2       | -36.8      | -85.6      | 82.9       | -56.7                                                                   | -165.4                                                                             | T    | 5.53             | 7.32              | 0.00             | 0.00             |
|        | 62.4       | -37.2      | -84.1      | 73.9       | -58.4                                                                   | -66.9                                                                              | T    | 5.47             | 7.68              | 0.00             | 0.00             |
|        | 75.5       | -67.7      | -84.8      | 55.3       | -177.0                                                                  | 45.0                                                                               | T    | 5.03             | 7.51              | 0.00             | 0.00             |
|        | 76.0       | -60.3      | -83.6      | 83.4       | -178.6                                                                  | -165.4                                                                             | T    | 2.54             | 4.38              | 0.16             | 0.02             |
|        | 81.3       | -63.5      | -85.2      | 84.0       | -143.4                                                                  | -165.1                                                                             | C    | 6.34             | 9.62              | 0.00             | 0.00             |
|        | 75.8       | -61.0      | -83.6      | 72.1       | -178.4                                                                  | -64.7                                                                              | T    | 2.21             | 4.00              | 0.27             | 0.04             |
| (β,γ') | -103.7     | 123.4      | -83.0      | 53.8       | 177.2                                                                   | 44.7                                                                               | T    | 2.30             | 3.64              | 0.24             | 0.08             |
|        | -116.2     | 125.2      | -83.0      | 55.6       | -172.9                                                                  | 43.6                                                                               | C    | 4.23             | 5.68              | 0.01             | 0.00             |
|        | -105.9     | 121.1      | -85.9      | 85.7       | 176.9                                                                   | -166.2                                                                             | T    | 1.26             | 2.08              | 1.37             | 1.07             |
|        | -104.3     | 121.5      | -85.6      | 86.5       | -173.8                                                                  | -166.4                                                                             | C    | 2.91             | 3.36              | 0.08             | 0.12             |
|        | -118.5     | 125.8      | -84.5      | 75.0       | 177.2                                                                   | -63.0                                                                              | T    | 1.13             | 2.39              | 1.70             | 0.64             |
|        | -120.6     | 127.3      | -84.0      | 75.8       | -172.9                                                                  | -62.2                                                                              | C    | 2.99             | 4.21              | 0.07             | 0.03             |
|        | -140.9     | 146.3      | -84.4      | 56.2       | 63.1                                                                    | 43.4                                                                               | T    | 3.21             | 4.98              | 0.05             | 0.01             |
|        | -149.1     | 149.0      | -84.1      | 56.0       | 93.6                                                                    | 43.3                                                                               | C    | 4.73             | 6.56              | 0.00             | 0.00             |
|        | -143.9     | 149.7      | -85.9      | 89.2       | 64.8                                                                    | -167.5                                                                             | T    | 1.86             | 2.49              | 0.50             | 0.54             |
|        | -150.0     | 148.1      | -87.3      | 89.4       | 93.9                                                                    | -167.5                                                                             | C    | 3.49             | 4.39              | 0.03             | 0.02             |
|        | -143.6     | 149.9      | -85.7      | 75.8       | 64.9                                                                    | -60.7                                                                              | T    | 1.68             | 2.62              | 0.68             | 0.43             |
|        | -117.6     | 155.3      | -84.4      | 56.4       | -67.3                                                                   | 43.3                                                                               | T    | 2.66             | 4.12              | 0.13             | 0.03             |
|        | -119.8     | 154.9      | -83.8      | 56.5       | -93.8                                                                   | 43.1                                                                               | C    | 4.59             | 5.98              | 0.00             | 0.00             |
|        | -120.8     | 156.8      | -86.3      | 90.4       | -66.1                                                                   | -168.2                                                                             | T    | 1.45             | 2.36              | 1.00             | 0.67             |
|        | -119.4     | 153.5      | -87.0      | 90.6       | -93.6                                                                   | -168.6                                                                             | C    | 3.19             | 3.90              | 0.05             | 0.05             |
|        | -121.1     | 157.1      | -85.8      | 75.9       | -66.1                                                                   | -61.2                                                                              | T    | 1.27             | 2.36              | 1.34             | 0.68             |
| -120.3 | 156.0      | -85.3      | 77.2       | -94.2      | -60.2                                                                   | C                                                                                  | 3.06 | 4.29             | 0.07              | 0.03             |                  |
| (β,β)  | -146.0     | 149.9      | -153.8     | 162.8      | 65.1                                                                    | 61.8                                                                               | T    | 1.81             | 2.85              | 0.55             | 0.29             |
|        | -146.1     | 150.9      | -153.1     | 143.7      | 65.4                                                                    | -173.5                                                                             | T    | 0.66             | 1.57              | 3.75             | 2.54             |

|                                                    | Val $\phi$ | Val $\psi$ | Phe $\phi$ | Phe $\psi$ | Val-Side<br>N-C $^{\alpha}$ -C(H)-C(H $_3$ ) | Phe Side<br>N-C $^{\alpha}$ -C(H $_2$ )-C $_{Ar}$ | Boc | $\Delta E_{ZPC}$ | $\Delta G_{298K}$ | $\chi(\Delta E)$ | $\chi(\Delta G)$ |
|----------------------------------------------------|------------|------------|------------|------------|----------------------------------------------|---------------------------------------------------|-----|------------------|-------------------|------------------|------------------|
|                                                    | -149.5     | 149.1      | -154.4     | 147.6      | 93.0                                         | -173.0                                            | C   | 2.08             | 3.18              | 0.34             | 0.17             |
|                                                    | -121.6     | 159.5      | -151.0     | 162.3      | -65.4                                        | 61.7                                              | T   | 1.23             | 1.86              | 1.44             | 1.56             |
|                                                    | -124.3     | 157.5      | -152.8     | 164.3      | -74.4                                        | 61.4                                              | C   | 3.03             | 4.25              | 0.07             | 0.03             |
|                                                    | -120.8     | 159.2      | -151.5     | 144.9      | -65.5                                        | -173.4                                            | T   | 0.05             | 0.00              | 10.54            | 36.09            |
|                                                    | -122.7     | 157.7      | -152.0     | 146.6      | -75.6                                        | -173.3                                            | C   | 1.93             | 3.04              | 0.44             | 0.21             |
|                                                    | -121.4     | 156.9      | -121.1     | 139.5      | -65.9                                        | -64.0                                             | T   | 1.21             | 1.60              | 1.48             | 2.43             |
|                                                    | -124.6     | 156.8      | -124.7     | 143.2      | -85.5                                        | -62.8                                             | C   | 2.97             | 3.32              | 0.08             | 0.13             |
|                                                    | -118.1     | 128.6      | -150.1     | 162.3      | 175.7                                        | 63.6                                              | T   | 1.42             | 2.30              | 1.05             | 0.75             |
|                                                    | -123.2     | 127.8      | -150.7     | 162.9      | -166.1                                       | 61.9                                              | C   | 2.92             | 3.94              | 0.08             | 0.05             |
|                                                    | -111.2     | 126.2      | -150.9     | 144.2      | 175.9                                        | -173.1                                            | T   | 0.07             | 0.30              | 10.21            | 21.82            |
|                                                    | -111.6     | 123.7      | -153.2     | 146.7      | -166.9                                       | -172.7                                            | C   | 1.47             | 1.09              | 0.97             | 5.76             |
|                                                    | -150.7     | 147.2      | -155.6     | 163.4      | 93.6                                         | 60.8                                              | C   | 3.16             | 4.26              | 0.06             | 0.03             |
| <b>(<math>\alpha'</math>,<math>\beta</math>)</b>   | 61.0       | 35.3       | -150.0     | 145.2      | -24.8                                        | -173.4                                            | C   | 7.30             | 8.89              | 0.00             | 0.00             |
| <b>(<math>\alpha'</math>,<math>\gamma'</math>)</b> | 60.0       | 36.8       | -85.4      | 85.9       | -35.6                                        | -168.0                                            | C   | 7.87             | 10.07             | 0.00             | 0.00             |
| <b>(<math>\delta</math>,<math>\gamma'</math>)</b>  | -81.9      | -31.8      | -83.8      | 52.0       | 170.2                                        | 45.2                                              | C   | 3.41             | 5.10              | 0.04             | 0.01             |
|                                                    | -83.9      | -31.7      | -83.4      | 53.6       | -151.6                                       | 44.0                                              | T   | 4.64             | 6.96              | 0.00             | 0.00             |
|                                                    | -82.8      | -31.6      | -85.0      | 83.3       | 171.0                                        | -165.7                                            | C   | 2.34             | 3.32              | 0.22             | 0.13             |
|                                                    | -83.1      | -29.9      | -84.7      | 72.8       | 170.5                                        | -62.4                                             | T   | 1.96             | 3.47              | 0.42             | 0.10             |
|                                                    | -84.8      | -29.0      | -84.5      | 72.2       | -152.0                                       | -62.6                                             | C   | 3.14             | 5.53              | 0.06             | 0.00             |
|                                                    | -108.9     | -2.6       | -84.0      | 54.6       | -65.0                                        | 44.0                                              | T   | 2.14             | 4.12              | 0.31             | 0.03             |
|                                                    | -106.2     | -3.2       | -83.1      | 53.0       | 14.2                                         | 45.0                                              | C   | 3.45             | 5.50              | 0.03             | 0.00             |
|                                                    | -111.4     | -0.9       | -85.6      | 81.7       | -65.1                                        | -165.1                                            | T   | 0.91             | 2.19              | 2.47             | 0.89             |
|                                                    | -100.7     | -5.9       | -85.2      | 83.7       | 13.5                                         | -165.9                                            | C   | 2.04             | 3.20              | 0.37             | 0.16             |
|                                                    | -112.6     | 2.6        | -84.4      | 71.6       | -65.3                                        | -61.7                                             | T   | 0.34             | 1.65              | 6.51             | 2.24             |
|                                                    | -107.0     | -0.2       | -84.4      | 73.2       | 7.7                                          | -62.4                                             | C   | 1.66             | 2.75              | 0.70             | 0.34             |
|                                                    | -91.2      | -17.4      | -84.0      | 54.7       | 70.3                                         | 43.9                                              | T   | 3.72             | 5.89              | 0.02             | 0.00             |
|                                                    | -89.9      | -18.0      | -83.3      | 53.9       | 121.6                                        | 44.2                                              | C   | 4.91             | 7.29              | 0.00             | 0.00             |
|                                                    | -94.6      | -15.3      | -85.7      | 81.7       | 71.3                                         | -165.1                                            | T   | 2.56             | 4.17              | 0.15             | 0.03             |
|                                                    | -90.2      | -17.5      | -84.9      | 84.4       | 120.5                                        | -165.4                                            | C   | 3.64             | 5.82              | 0.02             | 0.00             |
|                                                    | -103.0     | -7.8       | -83.9      | 71.4       | 72.0                                         | -62.4                                             | T   | 2.20             | 3.64              | 0.28             | 0.08             |
|                                                    | -92.5      | -13.2      | -83.4      | 73.0       | 121.8                                        | -62.2                                             | C   | 3.20             | 4.72              | 0.05             | 0.01             |
| <b>(<math>\delta</math>,<math>\beta</math>)</b>    | -80.3      | -31.3      | -145.6     | 160.8      | 173.0                                        | 62.9                                              | T   | 2.87             | 4.41              | 0.09             | 0.02             |
|                                                    | -82.0      | -32.3      | -146.2     | 162.4      | -154.2                                       | 63.1                                              | C   | 3.96             | 5.29              | 0.01             | 0.00             |
|                                                    | -80.1      | -31.0      | -146.6     | 143.7      | 171.4                                        | -173.4                                            | T   | 1.42             | 1.97              | 1.05             | 1.31             |
|                                                    | -80.0      | -32.8      | -148.2     | 142.6      | -154.5                                       | -172.9                                            | C   | 2.41             | 2.51              | 0.20             | 0.52             |
|                                                    | -84.3      | -30.8      | -114.1     | 130.4      | 171.2                                        | -62.8                                             | T   | 2.65             | 3.15              | 0.13             | 0.18             |
|                                                    | -84.1      | -30.8      | -100.7     | 128.5      | -152.8                                       | -62.4                                             | C   | 3.73             | 4.66              | 0.02             | 0.01             |
|                                                    | -113.1     | 4.4        | -145.0     | 161.4      | -65.2                                        | 62.9                                              | T   | 1.40             | 2.45              | 1.07             | 0.58             |
|                                                    | -109.9     | 2.8        | -143.0     | 161.3      | -0.3                                         | 64.6                                              | C   | 3.11             | 4.28              | 0.06             | 0.03             |
|                                                    | -108.7     | -0.1       | -149.8     | 142.0      | -65.5                                        | -173.2                                            | T   | 0.00             | 0.86              | 11.52            | 8.38             |
|                                                    | -101.4     | -4.1       | -148.8     | 140.6      | 16.5                                         | -173.8                                            | C   | 1.44             | 1.48              | 1.01             | 2.97             |
|                                                    | -113.4     | 0.9        | -108.8     | 125.6      | -65.5                                        | -61.8                                             | T   | 1.26             | 1.81              | 1.37             | 1.71             |
|                                                    | -106.9     | -4.8       | -143.9     | 161.0      | 73.3                                         | 65.2                                              | T   | 3.40             | 4.82              | 0.04             | 0.01             |
|                                                    | -97.6      | -10.4      | -139.5     | 161.1      | 112.4                                        | 66.3                                              | C   | 4.82             | 5.87              | 0.00             | 0.00             |

|                                              | Val $\phi$ | Val $\psi$ | Phe $\phi$ | Phe $\psi$ | Val-Side<br>N-C $^{\alpha}$ -C(H)-C(H $_3$ ) | Phe Side<br>N-C $^{\alpha}$ -C(H $_2$ )-C $_{Ar}$ | Boc | $\Delta E_{ZPC}$ | $\Delta G_{298K}$ | $\chi(\Delta E)$ | $\chi(\Delta G)$ |
|----------------------------------------------|------------|------------|------------|------------|----------------------------------------------|---------------------------------------------------|-----|------------------|-------------------|------------------|------------------|
|                                              | -89.9      | -16.8      | -150.0     | 144.1      | 70.3                                         | -173.3                                            | T   | 1.66             | 2.54              | 0.70             | 0.50             |
|                                              | -85.4      | -20.4      | -148.6     | 143.2      | 108.4                                        | -173.6                                            | C   | 2.72             | 3.34              | 0.12             | 0.13             |
|                                              | -96.4      | -15.3      | -111.3     | 126.5      | 69.6                                         | -63.3                                             | T   | 3.23             | 4.03              | 0.05             | 0.04             |
|                                              | -89.1      | -16.3      | -90.0      | 122.5      | 119.4                                        | -62.1                                             | C   | 4.17             | 5.40              | 0.01             | 0.00             |
|                                              | -108.2     | -0.7       | -99.2      | 126.3      | 8.8                                          | -62.4                                             | C   | 2.41             | 3.05              | 0.20             | 0.21             |
| <b>(<math>\gamma^{\prime},\beta</math>)</b>  | -88.4      | 65.5       | -147.7     | 134.3      | -73.7                                        | -173.7                                            | T   | 2.28             | 3.04              | 0.24             | 0.21             |
|                                              | -94.3      | 62.8       | -149.2     | 140.7      | -38.8                                        | -173.4                                            | C   | 4.01             | 4.69              | 0.01             | 0.01             |
|                                              | -88.7      | 54.8       | -113.7     | 122.8      | -71.2                                        | -65.4                                             | T   | 3.27             | 3.99              | 0.05             | 0.04             |
|                                              | -96.7      | 65.8       | -154.7     | 162.2      | 61.5                                         | 62.7                                              | T   | 5.60             | 6.82              | 0.00             | 0.00             |
|                                              | -90.3      | 68.6       | -124.7     | 134.9      | 60.7                                         | -66.1                                             | T   | 4.45             | 5.20              | 0.01             | 0.01             |
|                                              | -94.0      | 73.2       | -128.1     | 138.4      | 89.0                                         | -65.3                                             | C   | 6.25             | 8.01              | 0.00             | 0.00             |
|                                              | -86.1      | 56.5       | -86.5      | 82.7       | -71.5                                        | -165.4                                            | T   | 2.38             | 3.76              | 0.21             | 0.06             |
|                                              | -88.7      | 46.5       | -85.7      | 72.3       | -69.4                                        | -67.4                                             | T   | 2.63             | 4.54              | 0.14             | 0.02             |
|                                              | -86.6      | 70.7       | -88.2      | 82.4       | 60.4                                         | -165.7                                            | T   | 3.49             | 4.91              | 0.03             | 0.01             |
|                                              | -91.3      | 55.3       | -87.1      | 74.0       | 65.6                                         | -69.3                                             | T   | 4.28             | 6.66              | 0.01             | 0.00             |
| <b>(<math>\delta,\delta</math>)</b>          | -77.5      | -11.4      | -84.2      | -7.8       | 60.4                                         | -63.3                                             | T   | 0.04             | 2.30              | 10.75            | 0.75             |
|                                              | -68.5      | -28.2      | -79.9      | -7.1       | -66.5                                        | -62.9                                             | T   | 0.04             | 2.77              | 10.82            | 0.34             |
|                                              | -77.7      | -11.3      | -73.6      | -22.1      | 60.6                                         | -170.1                                            | T   | 1.19             | 3.64              | 1.54             | 0.08             |
|                                              | -68.0      | -30.2      | -88.0      | 3.0        | -66.8                                        | 56.3                                              | T   | 1.16             | 3.24              | 1.63             | 0.15             |
|                                              | -78.0      | -11.7      | -93.4      | 1.5        | 60.5                                         | 56.5                                              | T   | 2.48             | 4.16              | 0.18             | 0.03             |
|                                              | -73.4      | -19.9      | -90.0      | 1.0        | -163.3                                       | 56.6                                              | T   | 1.01             | 3.63              | 2.09             | 0.08             |
|                                              | -73.2      | -19.0      | -80.9      | -8.5       | -164.6                                       | -63.9                                             | T   | 1.16             | 3.65              | 1.64             | 0.08             |
|                                              | -72.7      | -19.7      | -69.7      | -23.9      | -163.8                                       | -171.2                                            | T   | 3.72             | 6.37              | 0.02             | 0.00             |
|                                              | -68.8      | -28.4      | -71.9      | -19.6      | -65.9                                        | -168.1                                            | T   | 4.12             | 7.06              | 0.01             | 0.00             |
| <b>(<math>\beta,\delta</math>)</b>           | -120.8     | 119.2      | -100.2     | -7.3       | -60.5                                        | -65.8                                             | T   | 2.07             | 2.75              | 0.35             | 0.35             |
|                                              | -89.2      | 112.4      | -108.3     | 0.6        | -59.4                                        | 58.5                                              | T   | 1.46             | 2.76              | 0.98             | 0.34             |
|                                              | -119.6     | 157.6      | -110.2     | 3.2        | 59.5                                         | 55.7                                              | T   | 1.77             | 3.38              | 0.58             | 0.12             |
|                                              | -121.8     | 159.0      | -103.1     | -4.8       | 58.8                                         | -63.7                                             | T   | 2.05             | 2.99              | 0.36             | 0.23             |
|                                              | -133.7     | 136.6      | -116.0     | 2.3        | -173.1                                       | 56.6                                              | T   | 2.85             | 3.93              | 0.09             | 0.05             |
|                                              | -120.2     | 158.2      | -83.5      | -28.1      | 59.7                                         | -171.7                                            | T   | 4.30             | 5.05              | 0.01             | 0.01             |
|                                              | -143.6     | 150.7      | -101.2     | -6.3       | -164.9                                       | -63.0                                             | T   | 2.99             | 4.50              | 0.07             | 0.02             |
| <b>(<math>\gamma^{\prime},\delta</math>)</b> | -85.2      | 84.5       | -79.4      | -30.5      | -54.0                                        | -173.4                                            | T   | 3.52             | 4.52              | 0.03             | 0.02             |

**Table S2.** Conformations and relative energies of LL-2·(DMSO-d<sub>6</sub>) obtained at B3LYP/6-31G+(2d,p)/IEFPCM(DMSO) level of theory. Relative zero-point corrected and Gibbs Free energies,  $\Delta E_{ZPC}$  and  $\Delta G_{298K}$ , are given in kcal/mol and the corresponding Boltzmann weights  $\chi$  in percentage. Only trans-Boc structures.

|                                    | Val $\phi$ | Val $\psi$ | Phe $\phi$ | Phe $\psi$ | Val-Side<br>N-C <sup><math>\alpha</math></sup> -C(H)-C(H <sub>3</sub> ) | Phe Side<br>N-C <sup><math>\alpha</math></sup> -C(H <sub>2</sub> )-C <sub>Ar</sub> | $\Delta E_{ZPC}$ | $\Delta G_{298K}$ | $\chi(\Delta E)$ | $\chi(\Delta G)$ |
|------------------------------------|------------|------------|------------|------------|-------------------------------------------------------------------------|------------------------------------------------------------------------------------|------------------|-------------------|------------------|------------------|
| <b>(<math>\beta,\beta</math>)</b>  | -121.9     | 158.4      | -127.3     | 140.7      | 59.6                                                                    | -63.9                                                                              | 0.49             | 0.59              | 4.62             | 4.27             |
|                                    | -112.3     | 124.6      | -148.2     | 130.7      | -59.9                                                                   | -175.9                                                                             | 0.55             | 0.63              | 4.13             | 3.97             |
|                                    | -120.1     | 158.1      | -148.6     | 129.5      | 59.8                                                                    | -175.9                                                                             | 0.59             | 0.69              | 3.89             | 3.60             |
|                                    | -121.8     | 160.4      | -146.9     | 130.2      | 60.2                                                                    | -175.7                                                                             | 0.60             | 0.62              | 3.79             | 4.01             |
|                                    | -120.9     | 127.3      | -127.3     | 141.4      | -60.0                                                                   | -64.6                                                                              | 0.63             | 0.74              | 3.64             | 3.29             |
|                                    | -120.7     | 127.4      | -128.7     | 140.3      | -60.4                                                                   | -64.3                                                                              | 0.78             | 0.89              | 2.82             | 2.54             |
|                                    | -117.9     | 128.7      | -150.9     | 161.0      | -60.4                                                                   | 64.1                                                                               | 0.88             | 0.93              | 2.39             | 2.40             |
|                                    | -117.7     | 125.4      | -99.7      | 119.0      | -60.5                                                                   | -174.2                                                                             | 1.10             | 0.83              | 1.64             | 2.84             |
|                                    | -145.4     | 149.3      | -129.7     | 141.8      | -167.2                                                                  | -63.6                                                                              | 1.14             | 1.24              | 1.54             | 1.41             |
|                                    | -146.2     | 150.9      | -147.5     | 129.5      | -166.8                                                                  | -176.1                                                                             | 1.14             | 1.18              | 1.52             | 1.56             |
|                                    | -145.9     | 151.1      | -148.0     | 130.2      | -166.7                                                                  | -175.9                                                                             | 1.16             | 1.17              | 1.48             | 1.59             |
|                                    | -146.0     | 150.5      | -128.4     | 139.6      | -166.5                                                                  | -63.7                                                                              | 1.21             | 1.25              | 1.35             | 1.39             |
|                                    | -145.0     | 149.2      | -154.4     | 161.8      | -167.4                                                                  | 63.2                                                                               | 1.26             | 1.24              | 1.26             | 1.42             |
|                                    | -116.5     | 125.9      | -101.4     | 118.6      | -60.7                                                                   | -173.7                                                                             | 1.37             | 1.51              | 1.04             | 0.89             |
|                                    | -121.1     | 155.9      | -108.5     | 117.5      | 59.6                                                                    | -173.8                                                                             | 1.57             | 1.74              | 0.74             | 0.61             |
|                                    | -120.9     | 155.4      | -115.5     | 126.7      | 59.9                                                                    | -65.1                                                                              | 1.64             | 1.92              | 0.66             | 0.45             |
|                                    | -121.1     | 126.8      | -107.7     | 125.8      | -60.8                                                                   | -67.2                                                                              | 1.64             | 1.88              | 0.65             | 0.48             |
|                                    | -120.9     | 155.4      | -115.5     | 126.7      | 59.9                                                                    | -65.1                                                                              | 1.65             | 1.92              | 0.65             | 0.45             |
|                                    | -95.8      | 115.0      | -151.0     | 139.2      | -58.9                                                                   | -174.2                                                                             | 1.83             | 2.05              | 0.48             | 0.36             |
|                                    | -110.0     | 120.2      | -124.9     | 140.0      | -59.4                                                                   | -66.1                                                                              | 2.28             | 2.61              | 0.22             | 0.14             |
|                                    | -110.3     | 121.8      | -124.8     | 142.8      | -59.6                                                                   | -65.7                                                                              | 2.44             | 2.71              | 0.17             | 0.12             |
|                                    | -143.7     | 143.0      | -123.4     | 118.3      | -171.1                                                                  | -174.4                                                                             | 2.45             | 2.61              | 0.17             | 0.14             |
|                                    | -141.4     | 141.0      | -109.2     | 117.8      | -171.7                                                                  | -173.9                                                                             | 2.58             | 2.73              | 0.13             | 0.11             |
|                                    | -145.2     | 141.1      | -116.8     | 128.1      | -172.1                                                                  | -66.6                                                                              | 2.63             | 2.95              | 0.12             | 0.08             |
|                                    | -105.9     | 121.8      | -150.0     | 160.3      | -59.7                                                                   | 64.7                                                                               | 2.65             | 2.87              | 0.12             | 0.09             |
|                                    | -110.3     | 156.1      | -125.6     | 142.8      | 64.5                                                                    | -64.5                                                                              | 3.29             | 3.56              | 0.04             | 0.03             |
|                                    | -100.9     | 158.3      | -149.3     | 139.6      | 66.8                                                                    | -174.8                                                                             | 3.30             | 3.38              | 0.04             | 0.04             |
| -103.7                             | 160.7      | -148.8     | 139.9      | 64.6       | -174.7                                                                  | 3.48                                                                               | 3.62             | 0.03              | 0.03             |                  |
| -107.2                             | 139.8      | -150.2     | 139.1      | -165.7     | -174.4                                                                  | 3.89                                                                               | 4.05             | 0.01              | 0.01             |                  |
| -125.5                             | 130.6      | -144.1     | 158.4      | -60.9      | 63.7                                                                    | 3.95                                                                               | 4.22             | 0.01              | 0.01             |                  |
| -145.1                             | 138.9      | -150.3     | 157.1      | -173.1     | 63.4                                                                    | 4.06                                                                               | 4.24             | 0.01              | 0.01             |                  |
| -94.0                              | 142.5      | -150.3     | 138.3      | -163.2     | -175.0                                                                  | 4.19                                                                               | 4.27             | 0.01              | 0.01             |                  |
| -116.0                             | 139.2      | -126.7     | 141.1      | -166.3     | -65.0                                                                   | 4.43                                                                               | 4.60             | 0.01              | 0.00             |                  |
| -117.8                             | 137.4      | -152.8     | 162.0      | -167.2     | 64.2                                                                    | 4.54                                                                               | 4.69             | 0.00              | 0.00             |                  |
| <b>(<math>\beta,\delta</math>)</b> | -119.3     | 120.0      | -110.0     | -37.6      | -59.1                                                                   | -66.1                                                                              | 0.56             | 0.71              | 4.04             | 3.49             |
|                                    | -121.0     | 155.7      | -109.1     | -37.4      | 59.6                                                                    | -65.3                                                                              | 0.59             | 0.67              | 3.86             | 3.73             |
|                                    | -120.9     | 123.0      | -110.5     | -35.9      | -60.1                                                                   | -65.0                                                                              | 0.62             | 0.78              | 3.69             | 3.08             |
|                                    | -107.0     | 118.0      | -117.3     | -51.5      | -59.5                                                                   | -176.1                                                                             | 1.15             | 1.27              | 1.51             | 1.34             |
|                                    | -121.0     | 158.1      | -109.5     | -49.0      | 59.6                                                                    | -175.9                                                                             | 1.20             | 1.18              | 1.38             | 1.55             |
|                                    | -111.6     | 123.4      | -114.1     | -49.2      | -60.5                                                                   | -175.5                                                                             | 1.21             | 1.29              | 1.36             | 1.31             |
|                                    | -121.3     | 157.8      | -107.4     | -49.2      | 59.6                                                                    | -175.6                                                                             | 1.29             | 1.28              | 1.19             | 1.31             |

|                                    | Val $\phi$ | Val $\psi$ | Phe $\phi$ | Phe $\psi$ | Val-Side<br>N-C $^{\alpha}$ -C(H)-C(H $_3$ ) | Phe Side<br>N-C $^{\alpha}$ -C(H $_2$ )-C $_{Ar}$ | $\Delta E_{ZPC}$ | $\Delta G_{298K}$ | $\chi(\Delta E)$ | $\chi(\Delta G)$ |
|------------------------------------|------------|------------|------------|------------|----------------------------------------------|---------------------------------------------------|------------------|-------------------|------------------|------------------|
|                                    | -112.2     | 120.9      | -135.6     | -14.8      | -60.6                                        | 62.7                                              | 1.51             | 1.57              | 0.82             | 0.81             |
|                                    | -143.1     | 139.8      | -115.7     | -41.9      | -171.0                                       | -65.5                                             | 1.72             | 1.76              | 0.57             | 0.58             |
|                                    | -115.8     | 121.4      | -129.9     | -15.9      | -60.7                                        | 63.5                                              | 1.77             | 1.87              | 0.53             | 0.49             |
|                                    | -120.2     | 154.2      | -132.9     | -15.3      | 59.5                                         | 62.2                                              | 1.78             | 1.76              | 0.52             | 0.58             |
|                                    | -120.4     | 153.9      | -131.8     | -16.4      | 59.8                                         | 63.0                                              | 1.92             | 1.88              | 0.41             | 0.48             |
|                                    | -145.0     | 143.9      | -119.2     | -51.1      | -169.9                                       | -175.0                                            | 2.15             | 2.11              | 0.28             | 0.32             |
|                                    | -145.0     | 143.7      | -118.4     | -51.4      | -169.9                                       | -175.0                                            | 2.23             | 2.19              | 0.24             | 0.28             |
|                                    | -91.9      | 100.3      | -99.4      | -6.4       | -57.3                                        | 60.4                                              | 2.56             | 2.70              | 0.14             | 0.12             |
|                                    | -141.8     | 135.1      | -138.1     | -18.0      | -174.9                                       | 64.0                                              | 3.05             | 3.08              | 0.06             | 0.06             |
|                                    | -87.1      | 82.1       | -76.5      | -33.4      | -53.4                                        | -174.4                                            | 3.18             | 3.29              | 0.05             | 0.04             |
|                                    | -134.5     | 130.5      | -140.1     | -17.7      | -175.1                                       | 62.2                                              | 3.36             | 3.33              | 0.04             | 0.04             |
|                                    | -122.3     | 156.7      | -112.3     | -99.1      | 59.5                                         | -67.0                                             | 3.71             | 3.97              | 0.02             | 0.01             |
|                                    | -99.7      | 155.5      | -106.8     | -2.4       | 65.3                                         | 57.4                                              | 4.05             | 4.08              | 0.01             | 0.01             |
|                                    | -107.7     | 157.0      | -105.4     | -2.1       | 62.9                                         | 57.0                                              | 4.33             | 4.32              | 0.01             | 0.01             |
|                                    | -142.8     | 141.0      | -113.5     | -97.8      | -172.1                                       | -68.7                                             | 4.70             | 4.98              | 0.00             | 0.00             |
|                                    | -112.8     | 120.3      | -108.7     | -88.5      | -59.0                                        | -68.3                                             | 5.16             | 5.35              | 0.00             | 0.00             |
|                                    | -112.6     | 123.8      | -106.0     | -3.8       | -171.9                                       | 57.5                                              | 5.22             | 5.21              | 0.00             | 0.00             |
|                                    | -105.8     | 158.7      | -76.6      | -34.5      | 62.9                                         | -173.5                                            | 5.32             | 5.37              | 0.00             | 0.00             |
|                                    | -109.1     | 157.1      | -107.9     | -87.8      | 64.1                                         | -66.6                                             | 6.19             | 6.44              | 0.00             | 0.00             |
|                                    | -145.9     | 154.4      | -92.7      | -18.1      | -162.4                                       | 58.6                                              | 6.48             | 6.59              | 0.00             | 0.00             |
|                                    | -112.2     | 141.7      | -109.1     | -95.2      | -164.7                                       | -68.0                                             | 7.59             | 7.74              | 0.00             | 0.00             |
|                                    | -95.0      | 142.4      | -126.6     | -73.3      | -163.5                                       | -174.1                                            | 7.81             | 7.87              | 0.00             | 0.00             |
|                                    | -120.4     | 153.9      | -131.8     | -16.4      | 59.8                                         | 63.0                                              | 1.92             | 1.88              | 0.41             | 0.48             |
| <b>(<math>\delta,\beta</math>)</b> | -100.9     | -27.7      | -130.2     | 116.6      | -162.6                                       | -174.4                                            | 3.30             | 3.48              | 0.04             | 0.03             |
|                                    | -110.0     | 0.2        | -119.1     | 137.8      | 60.4                                         | -64.8                                             | 0.53             | 0.53              | 4.31             | 4.68             |
|                                    | -111.2     | 2.4        | -145.3     | 160.6      | 61.7                                         | 66.1                                              | 0.71             | 0.65              | 3.15             | 3.81             |
|                                    | -93.1      | -47.3      | -126.5     | 119.9      | -61.0                                        | -174.4                                            | 1.04             | 1.16              | 1.82             | 1.60             |
|                                    | -78.2      | -34.2      | -137.2     | 126.7      | -64.4                                        | -176.2                                            | 1.04             | 1.15              | 1.81             | 1.63             |
|                                    | -94.4      | -50.4      | -116.6     | 118.5      | -60.9                                        | -174.6                                            | 1.27             | 1.40              | 1.22             | 1.08             |
|                                    | -81.2      | -32.6      | -116.6     | 135.3      | -63.9                                        | -64.3                                             | 1.31             | 1.36              | 1.16             | 1.16             |
|                                    | -112.6     | 2.6        | -146.0     | 136.7      | 64.6                                         | -174.7                                            | 1.70             | 1.85              | 0.60             | 0.51             |
|                                    | -79.3      | -33.4      | -145.6     | 161.3      | -63.8                                        | 65.0                                              | 1.74             | 1.72              | 0.56             | 0.62             |
|                                    | -113.6     | 3.1        | -145.3     | 139.2      | 64.4                                         | -174.4                                            | 1.81             | 1.98              | 0.50             | 0.40             |
|                                    | -85.1      | -19.7      | -143.4     | 129.5      | -163.4                                       | -175.8                                            | 1.85             | 2.01              | 0.46             | 0.38             |
|                                    | -93.4      | -51.3      | -97.9      | 124.3      | -60.5                                        | -65.4                                             | 1.89             | 2.16              | 0.43             | 0.30             |
|                                    | -89.4      | -19.1      | -116.9     | 134.9      | -164.4                                       | -66.2                                             | 2.00             | 2.06              | 0.36             | 0.35             |
|                                    | -110.7     | 1.8        | -117.9     | 138.4      | 65.1                                         | -67.1                                             | 2.33             | 2.57              | 0.20             | 0.15             |
|                                    | -111.2     | 1.3        | -122.6     | 142.9      | 64.6                                         | -67.0                                             | 2.37             | 2.56              | 0.19             | 0.15             |
|                                    | -80.1      | -33.3      | -116.0     | 138.2      | -63.4                                        | -64.8                                             | 2.60             | 2.91              | 0.13             | 0.08             |
|                                    | -95.1      | -12.6      | -140.4     | 160.0      | -160.6                                       | 67.9                                              | 2.61             | 2.55              | 0.13             | 0.15             |
|                                    | -78.9      | -33.3      | -144.6     | 160.3      | -63.8                                        | 65.3                                              | 2.86             | 3.12              | 0.08             | 0.06             |
|                                    | -78.9      | -33.5      | -144.5     | 160.6      | -63.7                                        | 65.4                                              | 2.90             | 3.12              | 0.08             | 0.06             |
|                                    | -102.5     | -2.1       | -145.4     | 160.1      | 67.4                                         | 68.0                                              | 2.96             | 3.14              | 0.07             | 0.06             |
|                                    | -102.5     | -2.1       | -145.4     | 160.1      | 67.4                                         | 68.0                                              | 2.96             | 3.14              | 0.07             | 0.06             |
|                                    | -78.6      | -23.3      | -147.1     | 138.3      | -160.2                                       | -174.7                                            | 2.99             | 3.10              | 0.07             | 0.06             |

|                                      | Val $\phi$ | Val $\psi$ | Phe $\phi$ | Phe $\psi$ | Val-Side<br>N-C $^{\alpha}$ -C(H)-C(H <sub>3</sub> ) | Phe Side<br>N-C $^{\alpha}$ -C(H <sub>2</sub> )-C $_{Ar}$ | $\Delta E_{ZPC}$ | $\Delta G_{298K}$ | $\chi(\Delta E)$ | $\chi(\Delta G)$ |
|--------------------------------------|------------|------------|------------|------------|------------------------------------------------------|-----------------------------------------------------------|------------------|-------------------|------------------|------------------|
|                                      | -106.6     | -32.3      | -105.0     | 132.6      | -166.8                                               | -67.3                                                     | 3.75             | 3.97              | 0.02             | 0.01             |
|                                      | -87.5      | -18.2      | -90.1      | 133.3      | -157.5                                               | -64.5                                                     | 3.97             | 4.14              | 0.01             | 0.01             |
|                                      | -86.4      | -16.4      | -139.5     | 158.6      | -156.2                                               | 68.6                                                      | 4.31             | 4.45              | 0.01             | 0.01             |
|                                      | -106.6     | -26.0      | -141.0     | 156.7      | -162.3                                               | 69.9                                                      | 5.03             | 5.19              | 0.00             | 0.00             |
|                                      | -104.5     | -3.1       | -138.6     | 125.6      | 61.5                                                 | -175.8                                                    | 0.00             | 0.00              | 10.49            | 11.47            |
| <b>(<math>\delta,\gamma</math>)</b>  | -110.6     | -48.3      | 72.4       | -54.0      | -60.8                                                | -62.4                                                     | 2.85             | 2.85              | 0.09             | 0.09             |
|                                      | -114.7     | -19.0      | 71.9       | -51.9      | 61.7                                                 | -61.4                                                     | 2.95             | 2.96              | 0.07             | 0.08             |
|                                      | -114.3     | -17.3      | 72.2       | -52.0      | 61.9                                                 | -61.4                                                     | 3.02             | 3.03              | 0.06             | 0.07             |
|                                      | -92.9      | -50.7      | 74.3       | -58.9      | -61.1                                                | -170.6                                                    | 3.10             | 3.07              | 0.06             | 0.06             |
|                                      | -91.9      | -48.4      | 74.1       | -59.6      | -61.3                                                | -170.8                                                    | 3.20             | 3.15              | 0.05             | 0.06             |
|                                      | -120.2     | -30.0      | 72.7       | -52.5      | -163.8                                               | -61.1                                                     | 4.04             | 4.07              | 0.01             | 0.01             |
|                                      | -96.7      | -11.8      | 73.2       | -58.5      | 61.6                                                 | -170.7                                                    | 4.17             | 4.24              | 0.01             | 0.01             |
|                                      | -111.8     | 0.6        | 73.6       | -58.3      | 65.1                                                 | -171.2                                                    | 4.21             | 4.06              | 0.01             | 0.01             |
|                                      | -116.5     | -26.0      | 73.0       | -52.5      | -162.4                                               | -61.0                                                     | 4.39             | 4.43              | 0.01             | 0.01             |
|                                      | -98.6      | -29.5      | 74.1       | -59.2      | -162.9                                               | -170.2                                                    | 4.81             | 4.84              | 0.00             | 0.00             |
|                                      | -79.5      | -22.5      | 74.0       | -58.8      | -159.9                                               | -171.3                                                    | 5.38             | 5.24              | 0.00             | 0.00             |
|                                      | -98.7      | -49.9      | 57.1       | -32.5      | -61.3                                                | 69.2                                                      | 6.70             | 6.63              | 0.00             | 0.00             |
|                                      | -99.3      | -49.0      | 56.7       | -32.1      | -61.2                                                | 68.8                                                      | 6.74             | 6.65              | 0.00             | 0.00             |
|                                      | -107.8     | -18.6      | 55.6       | -31.5      | 62.2                                                 | 67.3                                                      | 6.77             | 6.73              | 0.00             | 0.00             |
|                                      | -114.7     | 3.4        | 55.4       | -30.3      | 64.7                                                 | 66.7                                                      | 7.26             | 7.19              | 0.00             | 0.00             |
|                                      | -113.5     | -32.2      | 57.2       | -31.5      | -165.3                                               | 68.0                                                      | 8.14             | 8.02              | 0.00             | 0.00             |
|                                      | -82.2      | -20.9      | 55.3       | -31.1      | -158.9                                               | 69.7                                                      | 8.84             | 8.61              | 0.00             | 0.00             |
|                                      | -110.9     | -49.1      | 72.1       | -53.3      | -61.1                                                | -63.0                                                     | 2.81             | 2.85              | 0.09             | 0.09             |
| <b>(<math>\beta,\gamma'</math>)</b>  | -119.0     | 154.3      | 74.3       | -58.8      | 59.0                                                 | -170.7                                                    | 2.74             | 2.70              | 0.10             | 0.12             |
|                                      | -116.0     | 126.4      | 73.5       | -59.0      | -60.6                                                | -170.9                                                    | 2.83             | 2.81              | 0.09             | 0.10             |
|                                      | -93.0      | 111.4      | 72.8       | -58.8      | -58.3                                                | -171.4                                                    | 4.64             | 4.64              | 0.00             | 0.00             |
|                                      | -106.1     | 146.5      | 71.3       | -51.0      | 57.9                                                 | -63.9                                                     | 5.75             | 5.85              | 0.00             | 0.00             |
|                                      | -116.9     | 148.8      | 56.6       | -31.8      | 55.0                                                 | 70.9                                                      | 6.73             | 6.61              | 0.00             | 0.00             |
|                                      | -116.0     | 124.3      | 59.3       | -35.1      | -56.7                                                | 75.5                                                      | 6.74             | 6.64              | 0.00             | 0.00             |
|                                      | -106.1     | 146.5      | 57.1       | -31.9      | 58.4                                                 | 71.0                                                      | 10.07            | 10.06             | 0.00             | 0.00             |
|                                      | -116.8     | 147.5      | 71.0       | -51.1      | 54.7                                                 | -63.7                                                     | 2.77             | 2.80              | 0.10             | 0.10             |
| <b>(<math>\gamma',\gamma</math>)</b> | -87.1      | 79.2       | 69.0       | -50.9      | -54.0                                                | -63.0                                                     | 4.25             | 4.20              | 0.01             | 0.01             |
|                                      | -87.4      | 80.4       | 53.6       | -31.8      | -52.8                                                | 68.9                                                      | 8.03             | 7.90              | 0.00             | 0.00             |
| <b>(<math>\delta,\delta</math>)</b>  | -74.6      | -14.1      | -81.5      | -9.4       | 63.9                                                 | -64.6                                                     | 1.06             | 0.99              | 1.75             | 2.17             |
|                                      | -70.2      | -21.4      | -77.0      | -12.1      | -161.8                                               | -64.8                                                     | 1.49             | 1.37              | 0.85             | 1.13             |
|                                      | -67.4      | -27.9      | -79.6      | -6.8       | -68.2                                                | -64.4                                                     | 1.49             | 1.47              | 0.85             | 0.96             |
|                                      | -74.4      | -15.0      | -87.0      | -2.7       | 63.7                                                 | 58.2                                                      | 1.52             | 1.47              | 0.81             | 0.95             |
|                                      | -69.5      | -23.2      | -84.9      | -3.0       | -162.3                                               | 57.4                                                      | 1.83             | 1.75              | 0.47             | 0.59             |
|                                      | -101.9     | -62.0      | -116.5     | -14.4      | -58.7                                                | 62.1                                                      | 1.98             | 1.96              | 0.37             | 0.42             |
|                                      | -67.6      | -29.0      | -83.5      | -1.9       | -69.0                                                | 57.6                                                      | 2.01             | 1.92              | 0.35             | 0.45             |
|                                      | -96.0      | -49.0      | -75.4      | -31.7      | -61.4                                                | -172.5                                                    | 2.11             | 2.25              | 0.30             | 0.26             |
|                                      | -111.5     | -6.2       | -102.0     | -48.5      | 61.0                                                 | -66.6                                                     | 2.41             | 2.50              | 0.18             | 0.17             |
|                                      | -103.7     | -9.2       | -113.9     | -56.1      | 61.7                                                 | -175.8                                                    | 2.52             | 2.56              | 0.15             | 0.15             |
|                                      | -109.8     | -13.6      | -72.9      | -33.6      | 62.9                                                 | -172.1                                                    | 2.65             | 2.90              | 0.12             | 0.09             |

|                       | Val $\phi$ | Val $\psi$ | Phe $\phi$ | Phe $\psi$ | Val-Side<br>N-C $^{\alpha}$ -C(H)-C(H <sub>3</sub> ) | Phe Side<br>N-C $^{\alpha}$ -C(H <sub>2</sub> )-C $_{Ar}$ | $\Delta E_{ZPC}$ | $\Delta G_{298K}$ | $\chi(\Delta E)$ | $\chi(\Delta G)$ |
|-----------------------|------------|------------|------------|------------|------------------------------------------------------|-----------------------------------------------------------|------------------|-------------------|------------------|------------------|
|                       | -69.2      | -22.4      | -68.6      | -25.2      | -162.4                                               | -171.2                                                    | 3.08             | 2.92              | 0.06             | 0.08             |
|                       | -110.3     | 1.3        | -75.0      | -32.0      | 65.6                                                 | -172.3                                                    | 3.11             | 2.64              | 0.05             | 0.13             |
|                       | -67.6      | -27.0      | -66.0      | -25.8      | -67.5                                                | -171.4                                                    | 3.20             | 3.12              | 0.05             | 0.06             |
|                       | -68.5      | -24.4      | -68.5      | -26.0      | -160.7                                               | -172.3                                                    | 4.38             | 4.53              | 0.01             | 0.01             |
| ( $\delta, \gamma'$ ) | -110.0     | -33.4      | -123.2     | 11.5       | -165.8                                               | 62.5                                                      | 5.77             | 5.81              | 0.00             | 0.00             |
|                       | -97.5      | -55.9      | -86.4      | 73.5       | -60.4                                                | -67.6                                                     | 1.44             | 1.55              | 0.93             | 0.84             |
|                       | -94.2      | -51.1      | -86.3      | 83.1       | -61.2                                                | -166.7                                                    | 1.50             | 1.54              | 0.83             | 0.86             |
|                       | -92.1      | -49.5      | -86.3      | 83.6       | -61.2                                                | -166.0                                                    | 1.77             | 1.84              | 0.52             | 0.51             |
|                       | -110.0     | -22.1      | -88.2      | 83.8       | 61.9                                                 | -166.6                                                    | 2.34             | 2.40              | 0.20             | 0.20             |
|                       | -111.9     | 0.4        | -86.1      | 82.8       | 65.7                                                 | -166.4                                                    | 2.41             | 2.45              | 0.18             | 0.18             |
|                       | -96.6      | -7.2       | -84.6      | 72.2       | 67.2                                                 | -65.8                                                     | 2.49             | 2.58              | 0.16             | 0.15             |
|                       | -64.8      | -37.1      | -93.7      | 7.6        | -65.1                                                | -69.2                                                     | 2.52             | 2.67              | 0.15             | 0.13             |
|                       | -108.4     | -24.9      | -87.3      | 75.2       | 59.9                                                 | -72.9                                                     | 2.75             | 2.73              | 0.10             | 0.11             |
|                       | -78.5      | -34.3      | -85.3      | 72.5       | -65.2                                                | -36.6                                                     | 2.79             | 2.90              | 0.09             | 0.09             |
|                       | -78.5      | -34.3      | -85.3      | 72.5       | -65.2                                                | -67.5                                                     | 2.79             | 2.90              | 0.09             | 0.09             |
|                       | -71.1      | -25.5      | -91.9      | 3.2        | -165.9                                               | -70.9                                                     | 3.25             | 3.38              | 0.04             | 0.04             |
|                       | -106.7     | -34.7      | -88.2      | 83.9       | -166.0                                               | -166.4                                                    | 3.43             | 3.40              | 0.03             | 0.04             |
|                       | -81.7      | -19.9      | -83.6      | 72.4       | -159.3                                               | -65.4                                                     | 3.52             | 3.55              | 0.03             | 0.03             |
|                       | -124.5     | -41.0      | -88.0      | 78.2       | -170.7                                               | -68.3                                                     | 3.52             | 3.59              | 0.03             | 0.03             |
|                       | -81.4      | -22.0      | -86.1      | 82.8       | -159.3                                               | -166.6                                                    | 3.73             | 3.68              | 0.02             | 0.02             |
|                       | -110.5     | -35.6      | -86.2      | 74.9       | -167.9                                               | -70.4                                                     | 3.86             | 3.89              | 0.02             | 0.02             |
|                       | -91.6      | -10.0      | -83.5      | 50.0       | 67.2                                                 | 47.5                                                      | 4.67             | 4.70              | 0.00             | 0.00             |
|                       | -94.5      | -8.1       | -83.3      | 48.9       | 68.0                                                 | 47.8                                                      | 4.90             | 4.87              | 0.00             | 0.00             |
|                       | -97.5      | -55.9      | -86.4      | 73.5       | -60.4                                                | -36.8                                                     | 1.44             | 1.55              | 0.93             | 0.84             |



**Table S3.** Conformations and relative energies of LL-2·(DMSO-d<sub>6</sub>)<sub>2</sub> obtained at B3LYP/6-31G+(2d,p)/IEFPCM(DMSO) level of theory. Relative zero-point corrected and Gibbs Free energies,  $\Delta E_{ZPC}$  and  $\Delta G_{298K}$ , are given in kcal/mol and the corresponding Boltzmann weights  $\chi$  in percentage.

|                   | Val $\phi$ | Val $\psi$ | Phe $\phi$ | Phe $\psi$ | Val-Side<br>N-C $\alpha$ -C(H)-C(H <sub>3</sub> ) | Phe Side<br>N-C $\alpha$ -C(H <sub>2</sub> )-C <sub>Ar</sub> | Boc | $\Delta E_{ZPC}$ | $\Delta G_{298K}$ | $\chi(\Delta E)$ | $\chi(\Delta G)$ |
|-------------------|------------|------------|------------|------------|---------------------------------------------------|--------------------------------------------------------------|-----|------------------|-------------------|------------------|------------------|
| ( $\beta,\beta$ ) | -121.9     | 156.9      | -116.1     | 131.1      | 60.0                                              | -64.4                                                        | T   | 0.21             | 0.33              | 12.47            | 11.77            |
|                   | -119.2     | 130.1      | -131.8     | 117.4      | -61.2                                             | -174.3                                                       | T   | 0.91             | 1.04              | 3.88             | 3.50             |
|                   | -121.8     | 156.8      | -115.7     | 130.5      | 59.9                                              | -65.4                                                        | T   | 0.94             | 1.12              | 3.68             | 3.05             |
|                   | -113.8     | 118.4      | -107.7     | -35.6      | -59.3                                             | -66.7                                                        | T   | 1.02             | 1.25              | 3.20             | 2.48             |
|                   | -94.0      | 118.9      | -148.2     | 130.1      | -59.8                                             | -175.4                                                       | T   | 1.06             | 1.26              | 2.99             | 2.41             |
|                   | -121.1     | 157.4      | -125.1     | 115.4      | 60.2                                              | -174.0                                                       | T   | 1.23             | 1.39              | 2.22             | 1.95             |
|                   | -136.6     | 141.1      | -126.6     | 117.9      | -171.7                                            | -174.5                                                       | T   | 1.49             | 1.56              | 1.45             | 1.47             |
|                   | -103.4     | 123.3      | -150.3     | 161.1      | -60.2                                             | 65.8                                                         | T   | 1.49             | 1.61              | 1.44             | 1.34             |
|                   | -121.0     | 128.5      | -106.9     | 140.5      | -61.3                                             | -66.8                                                        | T   | 1.50             | 1.78              | 1.42             | 1.02             |
|                   | -112.1     | 119.7      | -126.1     | 146.7      | -59.1                                             | -67.0                                                        | T   | 1.59             | 1.77              | 1.23             | 1.03             |
|                   | -122.8     | 156.1      | -114.5     | 130.8      | 59.1                                              | -64.9                                                        | C   | 1.67             | 1.81              | 1.07             | 0.95             |
|                   | -120.4     | 156.0      | -136.8     | 116.6      | 60.1                                              | -173.2                                                       | T   | 1.73             | 1.89              | 0.97             | 0.83             |
|                   | -144.6     | 141.1      | -121.1     | 133.3      | -172.0                                            | -64.5                                                        | T   | 2.02             | 2.16              | 0.59             | 0.53             |
|                   | -122.1     | 158.0      | -136.9     | 118.3      | 59.4                                              | -174.7                                                       | C   | 2.10             | 2.22              | 0.51             | 0.48             |
|                   | -114.9     | 153.3      | -109.5     | -35.7      | 63.2                                              | -64.8                                                        | T   | 2.10             | 2.17              | 0.51             | 0.52             |
|                   | -126.6     | 128.2      | -113.0     | 132.5      | -60.8                                             | -65.0                                                        | C   | 2.27             | 2.44              | 0.39             | 0.33             |
|                   | -88.7      | 123.2      | -147.6     | 128.7      | -60.6                                             | -175.2                                                       | C   | 2.33             | 2.49              | 0.35             | 0.30             |
|                   | -125.7     | 131.2      | -126.8     | 118.5      | -61.4                                             | -174.5                                                       | C   | 2.35             | 2.48              | 0.34             | 0.31             |
|                   | -150.1     | 143.7      | -134.8     | 118.4      | -171.3                                            | -174.4                                                       | C   | 2.35             | 2.40              | 0.34             | 0.35             |
|                   | -124.2     | 156.6      | -114.2     | 130.9      | 59.3                                              | -64.5                                                        | C   | 2.35             | 2.60              | 0.34             | 0.25             |
|                   | -122.9     | 157.2      | -133.0     | 117.9      | 59.4                                              | -174.3                                                       | C   | 2.36             | 2.40              | 0.33             | 0.36             |
|                   | -108.5     | 158.7      | -125.1     | 140.5      | 65.2                                              | -64.0                                                        | T   | 2.37             | 2.59              | 0.33             | 0.26             |
|                   | -91.6      | 126.8      | -118.5     | 117.5      | -61.5                                             | -173.9                                                       | T   | 2.38             | 2.59              | 0.32             | 0.26             |
|                   | -104.9     | 159.4      | -147.9     | 128.7      | 65.3                                              | -175.4                                                       | T   | 2.41             | 2.54              | 0.31             | 0.28             |
|                   | -110.7     | 124.2      | -102.8     | 121.9      | -60.3                                             | -67.9                                                        | T   | 2.76             | 3.01              | 0.17             | 0.13             |
|                   | -151.2     | 141.2      | -120.1     | 131.1      | -172.2                                            | -64.6                                                        | C   | 2.77             | 2.93              | 0.17             | 0.15             |
|                   | -96.9      | 125.3      | -116.1     | 117.2      | -61.2                                             | -173.8                                                       | T   | 2.98             | 3.19              | 0.12             | 0.09             |
|                   | -116.2     | 121.2      | -151.5     | 161.8      | -59.7                                             | 65.9                                                         | C   | 3.00             | 3.09              | 0.11             | 0.11             |
|                   | -109.9     | 121.7      | -126.3     | 134.6      | -60.1                                             | -65.6                                                        | C   | 3.00             | 3.26              | 0.11             | 0.08             |
|                   | -115.7     | 153.2      | -111.8     | 128.4      | 63.2                                              | -65.0                                                        | T   | 3.08             | 3.41              | 0.10             | 0.06             |
|                   | -119.8     | 119.6      | -104.3     | -35.0      | -60.2                                             | -67.3                                                        | C   | 3.12             | 3.18              | 0.09             | 0.09             |
|                   | -130.2     | 138.0      | -153.3     | 161.2      | -169.3                                            | 63.8                                                         | T   | 3.24             | 3.27              | 0.08             | 0.08             |
|                   | -123.3     | 139.2      | -149.6     | 129.9      | -167.9                                            | -175.1                                                       | T   | 3.32             | 3.42              | 0.07             | 0.06             |
|                   | -131.7     | 141.2      | -127.0     | 138.9      | -167.5                                            | -64.0                                                        | T   | 3.33             | 3.53              | 0.06             | 0.05             |
|                   | -108.7     | 150.4      | -114.3     | 116.3      | 63.6                                              | -174.2                                                       | T   | 3.36             | 3.56              | 0.06             | 0.05             |
|                   | -83.9      | 157.1      | -149.4     | 129.1      | 65.8                                              | -175.4                                                       | C   | 3.46             | 3.53              | 0.05             | 0.05             |
|                   | -106.8     | 154.5      | -127.4     | 119.1      | 64.6                                              | -173.8                                                       | T   | 3.55             | 3.70              | 0.04             | 0.04             |
|                   | -110.7     | 157.1      | -125.1     | 141.3      | 63.3                                              | -64.8                                                        | C   | 3.58             | 3.68              | 0.04             | 0.04             |
|                   | -116.0     | 155.9      | -104.4     | -36.9      | 62.9                                              | -64.7                                                        | C   | 3.77             | 3.88              | 0.03             | 0.03             |
|                   | -81.1      | 133.2      | -114.8     | 115.7      | -63.5                                             | -173.6                                                       | C   | 3.78             | 3.89              | 0.03             | 0.03             |
|                   | -82.5      | 132.6      | -112.7     | 116.6      | -63.4                                             | -173.9                                                       | C   | 3.87             | 4.05              | 0.03             | 0.02             |

|                                    | Val $\phi$ | Val $\psi$ | Phe $\phi$ | Phe $\psi$ | Val-Side<br>N-C $^{\alpha}$ -C(H)-C(H $_3$ ) | Phe Side<br>N-C $^{\alpha}$ -C(H $_2$ )-C $_{Ar}$ | Boc | $\Delta E_{ZPC}$ | $\Delta G_{298K}$ | $\chi(\Delta E)$ | $\chi(\Delta G)$ |
|------------------------------------|------------|------------|------------|------------|----------------------------------------------|---------------------------------------------------|-----|------------------|-------------------|------------------|------------------|
|                                    | -126.4     | 133.3      | -106.4     | 116.0      | -171.7                                       | -173.8                                            | T   | 3.91             | 4.09              | 0.02             | 0.02             |
|                                    | -102.1     | 157.3      | -148.7     | 129.5      | 64.3                                         | -175.8                                            | C   | 4.00             | 4.04              | 0.02             | 0.02             |
|                                    | -123.6     | 125.3      | -108.5     | 129.2      | -61.0                                        | -66.7                                             | C   | 4.09             | 3.85              | 0.02             | 0.03             |
|                                    | -141.7     | 139.5      | -153.5     | 161.3      | -169.1                                       | 63.1                                              | C   | 4.58             | 4.52              | 0.01             | 0.01             |
|                                    | -131.9     | 142.0      | -146.9     | 129.2      | -168.0                                       | -176.1                                            | C   | 4.63             | 4.71              | 0.01             | 0.01             |
|                                    | -124.7     | 133.1      | -105.5     | 118.0      | -171.3                                       | -174.2                                            | T   | 4.72             | 4.94              | 0.01             | 0.00             |
|                                    | -139.2     | 144.4      | -126.9     | 140.2      | -167.0                                       | -63.5                                             | C   | 4.76             | 4.86              | 0.01             | 0.01             |
|                                    | -126.7     | 132.8      | -110.7     | 121.8      | -171.7                                       | -67.4                                             | T   | 4.79             | 5.07              | 0.01             | 0.00             |
|                                    | -102.7     | 156.0      | -127.5     | 118.8      | 64.3                                         | -173.9                                            | C   | 4.89             | 5.11              | 0.00             | 0.00             |
|                                    | -90.5      | 156.8      | -105.1     | 118.1      | 66.4                                         | -174.1                                            | C   | 4.96             | 5.20              | 0.00             | 0.00             |
|                                    | -144.7     | 141.0      | -120.5     | 129.6      | -172.2                                       | -65.3                                             | T   | 5.25             | 5.71              | 0.00             | 0.00             |
|                                    | -142.3     | 132.6      | -113.4     | 126.9      | -173.6                                       | -64.5                                             | C   | 5.61             | 5.90              | 0.00             | 0.00             |
|                                    | -142.8     | 135.6      | -105.4     | 118.1      | -171.8                                       | -173.4                                            | C   | 5.62             | 5.83              | 0.00             | 0.00             |
|                                    | -151.0     | 141.8      | -120.3     | 128.4      | -172.1                                       | -65.1                                             | C   | 6.42             | 6.80              | 0.00             | 0.00             |
| <b>(<math>\beta,\delta</math>)</b> | -103.1     | 117.1      | -114.5     | -49.9      | -59.1                                        | -175.7                                            | T   | 1.18             | 1.20              | 2.42             | 2.71             |
|                                    | -108.8     | 117.8      | -126.6     | -16.7      | -60.0                                        | 64.1                                              | T   | 2.26             | 2.35              | 0.39             | 0.39             |
|                                    | -111.3     | 144.9      | -129.4     | -50.4      | 61.9                                         | -175.5                                            | T   | 2.98             | 2.93              | 0.12             | 0.14             |
|                                    | -132.2     | 129.6      | -110.3     | -36.8      | -173.2                                       | -65.3                                             | T   | 3.01             | 3.19              | 0.11             | 0.09             |
|                                    | -106.1     | 156.9      | -108.5     | -48.8      | 63.9                                         | -176.1                                            | T   | 3.01             | 3.10              | 0.11             | 0.11             |
|                                    | -119.1     | 130.7      | -123.5     | -50.6      | -171.4                                       | -176.1                                            | T   | 3.50             | 3.43              | 0.05             | 0.06             |
|                                    | -110.7     | 152.1      | -131.1     | -17.2      | 63.7                                         | 63.5                                              | T   | 3.73             | 3.76              | 0.03             | 0.04             |
|                                    | -90.0      | 126.0      | -100.3     | -51.1      | -61.0                                        | -175.9                                            | C   | 3.75             | 3.81              | 0.03             | 0.03             |
|                                    | -122.5     | 126.3      | -112.7     | -92.5      | -59.8                                        | -66.6                                             | T   | 3.76             | 3.95              | 0.03             | 0.03             |
|                                    | -136.3     | 131.7      | -114.7     | -50.6      | -171.7                                       | -175.6                                            | T   | 3.76             | 3.78              | 0.03             | 0.03             |
|                                    | -116.9     | 122.6      | -121.2     | -15.9      | -61.7                                        | 64.1                                              | C   | 4.32             | 4.33              | 0.01             | 0.01             |
|                                    | -113.0     | 157.8      | -106.5     | -48.9      | 63.4                                         | -175.3                                            | C   | 4.41             | 4.44              | 0.01             | 0.01             |
|                                    | -119.3     | 124.7      | -140.6     | -84.0      | -61.0                                        | -171.9                                            | T   | 4.48             | 4.67              | 0.01             | 0.01             |
|                                    | -117.5     | 150.5      | -136.5     | -87.2      | 59.7                                         | -169.7                                            | T   | 4.54             | 4.58              | 0.01             | 0.01             |
|                                    | -147.0     | 134.9      | -109.2     | -38.0      | -172.7                                       | -65.6                                             | C   | 4.71             | 4.82              | 0.01             | 0.01             |
|                                    | -107.8     | 151.1      | -130.9     | -15.8      | 63.5                                         | 63.4                                              | C   | 5.32             | 5.38              | 0.00             | 0.00             |
|                                    | -148.0     | 135.7      | -110.2     | -50.5      | -172.0                                       | -175.2                                            | C   | 5.33             | 5.34              | 0.00             | 0.00             |
|                                    | -148.0     | 135.7      | -110.2     | -50.5      | -172.0                                       | -175.2                                            | C   | 5.33             | 5.33              | 0.00             | 0.00             |
|                                    | -137.1     | 139.6      | -117.4     | -86.6      | -172.4                                       | -170.5                                            | T   | 5.74             | 5.88              | 0.00             | 0.00             |
|                                    | -126.3     | 132.7      | -110.6     | -108.0     | -60.9                                        | -65.0                                             | C   | 5.84             | 5.99              | 0.00             | 0.00             |
|                                    | -121.2     | 154.4      | -138.6     | -84.7      | 59.1                                         | -171.0                                            | C   | 5.91             | 6.08              | 0.00             | 0.00             |
|                                    | -122.0     | 127.3      | -139.7     | -85.3      | -62.0                                        | -171.2                                            | C   | 6.19             | 6.34              | 0.00             | 0.00             |
|                                    | -151.0     | 139.9      | -139.2     | -84.9      | -173.8                                       | -166.7                                            | C   | 6.56             | 6.59              | 0.00             | 0.00             |
|                                    | -128.7     | 126.4      | -105.8     | -3.6       | -173.7                                       | 57.4                                              | T   | 7.70             | 7.76              | 0.00             | 0.00             |
|                                    | -150.8     | 144.6      | -70.2      | -27.7      | -166.8                                       | 75.6                                              | C   | 8.81             | 8.84              | 0.00             | 0.00             |
| <b>(<math>\beta,\gamma</math>)</b> | -96.2      | 121.8      | 73.0       | -58.9      | -60.2                                        | -171.4                                            | T   | 3.43             | 3.46              | 0.05             | 0.06             |
|                                    | -113.0     | 153.8      | 74.6       | -58.2      | 63.2                                         | -170.3                                            | T   | 4.25             | 4.27              | 0.01             | 0.01             |
|                                    | -109.7     | 147.0      | 71.1       | -50.5      | 58.3                                         | -63.9                                             | T   | 4.39             | 4.45              | 0.01             | 0.01             |
|                                    | -86.5      | 130.7      | 73.4       | -59.1      | -62.2                                        | -171.3                                            | C   | 5.20             | 5.20              | 0.00             | 0.00             |
|                                    | -110.2     | 156.8      | 74.5       | -58.8      | 63.4                                         | -170.9                                            | C   | 5.89             | 5.90              | 0.00             | 0.00             |

|                                      | Val $\phi$ | Val $\psi$ | Phe $\phi$ | Phe $\psi$ | Val-Side<br>N-C $^{\alpha}$ -C(H)-C(H $_3$ ) | Phe Side<br>N-C $^{\alpha}$ -C(H $_2$ )-C $_{Ar}$ | Boc | $\Delta E_{ZPC}$ | $\Delta G_{298K}$ | $\chi(\Delta E)$ | $\chi(\Delta G)$ |
|--------------------------------------|------------|------------|------------|------------|----------------------------------------------|---------------------------------------------------|-----|------------------|-------------------|------------------|------------------|
|                                      | -106.9     | 150.0      | 71.0       | -50.6      | 58.1                                         | -64.8                                             | C   | 6.12             | 6.15              | 0.00             | 0.00             |
|                                      | -104.5     | 117.3      | 58.5       | -34.2      | -56.9                                        | 75.2                                              | T   | 7.54             | 7.50              | 0.00             | 0.00             |
|                                      | -110.3     | 144.4      | 56.8       | -31.4      | 59.4                                         | 71.7                                              | T   | 8.14             | 8.09              | 0.00             | 0.00             |
|                                      | -89.9      | 129.2      | 59.5       | -35.0      | -58.4                                        | 76.0                                              | C   | 9.47             | 9.41              | 0.00             | 0.00             |
|                                      | -101.6     | 148.8      | 57.0       | -32.5      | 59.8                                         | 71.9                                              | C   | 10.02            | 10.08             | 0.00             | 0.00             |
| <b>(<math>\delta,\beta</math>)</b>   | -93.0      | -46.7      | -132.0     | 120.1      | -60.7                                        | -174.9                                            | T   | 0.00             | 0.00              | 17.90            | 20.39            |
|                                      | -90.9      | -46.5      | -129.2     | 117.3      | -60.7                                        | -174.3                                            | T   | 0.32             | 0.34              | 10.46            | 11.52            |
|                                      | -96.3      | -52.1      | -97.4      | 129.4      | -60.1                                        | -65.4                                             | T   | 4.46             | 5.00              | 0.01             | 0.00             |
|                                      | -98.0      | -51.5      | -102.5     | 129.9      | -59.8                                        | -64.6                                             | T   | 0.38             | 0.46              | 9.41             | 9.30             |
|                                      | -87.8      | -47.7      | -99.2      | 132.2      | -61.0                                        | -64.8                                             | C   | 1.40             | 1.40              | 1.69             | 1.91             |
|                                      | -86.1      | -45.9      | -133.0     | 117.1      | -61.4                                        | -174.5                                            | C   | 1.47             | 1.49              | 1.50             | 1.66             |
|                                      | -85.1      | -45.1      | -130.7     | 120.3      | -61.2                                        | -175.0                                            | C   | 1.17             | 1.19              | 2.50             | 2.74             |
|                                      | -78.2      | -37.4      | -149.3     | 161.9      | -62.0                                        | 66.4                                              | T   | 1.82             | 1.89              | 0.83             | 0.84             |
|                                      | -76.6      | -36.7      | -148.3     | 161.4      | -62.8                                        | 66.4                                              | C   | 3.09             | 3.05              | 0.10             | 0.12             |
|                                      | -81.6      | -32.2      | -115.4     | 135.3      | -63.0                                        | -64.3                                             | T   | 1.37             | 1.57              | 1.78             | 1.44             |
|                                      | -81.4      | -31.5      | -113.8     | 133.8      | -63.4                                        | -64.4                                             | C   | 2.57             | 2.70              | 0.23             | 0.21             |
|                                      | -73.7      | -30.0      | -115.3     | 113.9      | -161.2                                       | -173.4                                            | T   | 5.84             | 6.24              | 0.00             | 0.00             |
|                                      | -112.0     | -29.1      | -129.5     | 120.4      | -162.7                                       | -175.2                                            | T   | 2.17             | 1.66              | 0.45             | 1.24             |
|                                      | -77.2      | -28.6      | -110.7     | 117.4      | -162.0                                       | -173.4                                            | C   | 6.80             | 6.96              | 0.00             | 0.00             |
|                                      | -97.0      | -26.5      | -125.3     | 119.3      | -162.3                                       | -175.3                                            | C   | 3.27             | 3.12              | 0.07             | 0.11             |
|                                      | -81.5      | -20.8      | -137.1     | 125.1      | -158.7                                       | -175.6                                            | T   | 2.11             | 2.09              | 0.51             | 0.60             |
|                                      | -83.7      | -19.8      | -134.3     | 125.4      | -160.0                                       | -175.8                                            | C   | 2.84             | 2.87              | 0.15             | 0.16             |
|                                      | -87.6      | -19.6      | -114.6     | 135.2      | -160.9                                       | -66.3                                             | C   | 3.56             | 3.60              | 0.04             | 0.05             |
|                                      | -87.3      | -15.7      | -140.8     | 159.6      | -156.0                                       | 68.6                                              | T   | 3.45             | 3.44              | 0.05             | 0.06             |
|                                      | -87.8      | -15.5      | -139.9     | 159.6      | -158.4                                       | 68.9                                              | C   | 4.20             | 4.18              | 0.01             | 0.02             |
|                                      | -93.5      | -14.4      | -117.0     | 139.2      | -156.8                                       | -66.9                                             | T   | 3.09             | 3.16              | 0.10             | 0.10             |
|                                      | -100.0     | -4.1       | -144.6     | 127.6      | 64.7                                         | -176.0                                            | C   | 2.00             | 2.08              | 0.61             | 0.61             |
|                                      | -99.3      | -3.5       | -144.5     | 160.2      | 65.4                                         | 67.5                                              | C   | 2.75             | 2.73              | 0.17             | 0.20             |
|                                      | -101.5     | -2.8       | -145.9     | 160.2      | 67.4                                         | 66.7                                              | T   | 1.97             | 2.03              | 0.65             | 0.66             |
|                                      | -111.2     | 0.2        | -124.5     | 141.8      | 64.3                                         | -67.1                                             | T   | 1.35             | 1.44              | 1.82             | 1.81             |
|                                      | -110.3     | 2.3        | -143.5     | 127.2      | 65.3                                         | -175.5                                            | T   | 1.02             | 1.13              | 3.22             | 3.02             |
| <b>(<math>\delta,\gamma'</math>)</b> | -66.1      | -33.3      | -95.9      | 9.4        | -70.3                                        | -67.2                                             | T   | 3.65             | 3.83              | 0.04             | 0.03             |
|                                      | -88.1      | -49.2      | -86.0      | 73.5       | -61.7                                        | -36.8                                             | C   | 4.80             | 4.95              | 0.01             | 0.00             |
|                                      | -81.3      | -39.6      | -89.2      | 79.9       | -67.2                                        | -165.1                                            | T   | 4.88             | 4.98              | 0.00             | 0.00             |
|                                      | -92.9      | -54.2      | -86.3      | 73.2       | -60.7                                        | -68.5                                             | C   | 5.00             | 5.22              | 0.00             | 0.00             |
|                                      | -78.4      | -40.7      | -89.8      | 80.7       | -67.5                                        | -163.8                                            | T   | 5.58             | 5.63              | 0.00             | 0.00             |
|                                      | -83.0      | -35.5      | -88.6      | 79.7       | -66.8                                        | -165.1                                            | C   | 5.63             | 5.64              | 0.00             | 0.00             |
|                                      | -80.2      | -38.3      | -89.0      | 84.1       | -67.5                                        | -165.3                                            | C   | 6.63             | 6.69              | 0.00             | 0.00             |
|                                      | -99.8      | -56.3      | -86.2      | 73.4       | -59.9                                        | -37.6                                             | T   | 3.95             | 4.20              | 0.02             | 0.02             |
| <b>(<math>\delta,\delta</math>)</b>  | -84.8      | -17.9      | -113.4     | -56.0      | 62.4                                         | -175.8                                            | C   | 4.47             | 4.48              | 0.01             | 0.01             |
|                                      | -70.0      | -22.9      | -85.7      | -2.8       | -162.2                                       | 57.6                                              | T   | 4.64             | 4.11              | 0.01             | 0.02             |
|                                      | -80.7      | -35.0      | -93.6      | -52.3      | -67.8                                        | -175.5                                            | C   | 5.09             | 5.25              | 0.00             | 0.00             |
|                                      | -87.8      | -31.7      | -98.1      | -2.7       | -66.7                                        | -66.2                                             | C   | 5.64             | 5.85              | 0.00             | 0.00             |
|                                      | -61.5      | -34.3      | -68.3      | -24.4      | -71.8                                        | -169.3                                            | T   | 5.72             | 5.78              | 0.00             | 0.00             |

|  | Val $\phi$ | Val $\psi$ | Phe $\phi$ | Phe $\psi$ | Val-Side<br>N-C $^{\alpha}$ -C(H)-C(H <sub>3</sub> ) | Phe Side<br>N-C $^{\alpha}$ -C(H <sub>2</sub> )-C <sub>Ar</sub> | Boc | $\Delta E_{ZPC}$ | $\Delta G_{298K}$ | $\chi(\Delta E)$ | $\chi(\Delta G)$ |
|--|------------|------------|------------|------------|------------------------------------------------------|-----------------------------------------------------------------|-----|------------------|-------------------|------------------|------------------|
|  | -67.0      | -31.7      | -85.8      | -0.4       | -66.2                                                | 56.6                                                            | T   | 6.99             | 7.38              | 0.00             | 0.00             |
|  | -85.1      | -17.3      | -110.3     | -56.4      | 63.6                                                 | -175.2                                                          | T   | 3.91             | 4.05              | 0.02             | 0.02             |

**Table S2.** Conformations and relative energies of LL-2·(DMSO-d<sub>6</sub>)<sub>3</sub> obtained at B3LYP/6-31G+(2d,p)/IEFPCM(DMSO) level of theory. Relative zero-point corrected and Gibbs Free energies,  $\Delta E_{ZPC}$  and  $\Delta G_{298K}$ , are given in kcal/mol and the corresponding Boltzmann weights  $\chi$  in percentage. Only trans-Boc structures.

|        | Val $\phi$ | Val $\psi$ | Phe $\phi$ | Phe $\psi$ | Val-Side<br>N-C $^{\alpha}$ -C(H)-C(H <sub>3</sub> ) | Phe Side<br>N-C $^{\alpha}$ -C(H <sub>2</sub> )-C <sub>Ar</sub> | $\Delta E_{ZPC}$ | $\Delta G_{298K}$ | $\chi(\Delta E)$ | $\chi(\Delta G)$ |
|--------|------------|------------|------------|------------|------------------------------------------------------|-----------------------------------------------------------------|------------------|-------------------|------------------|------------------|
| (δ,β)  | -91.5      | -49.4      | -108.3     | 118.8      | -61.3                                                | -174.4                                                          | 1.95             | 2.26              | 1.80             | 1.22             |
|        | -78.8      | -41.9      | -102.9     | 130.7      | -67.2                                                | -65.2                                                           | 3.34             | 3.30              | 0.17             | 0.21             |
|        | -73.8      | -30.2      | -118.8     | 118.1      | -161.3                                               | -173.9                                                          | 3.97             | 4.09              | 0.06             | 0.06             |
| (β,β)  | -94.8      | 127.8      | -121.9     | 118.5      | -61.1                                                | -174.6                                                          | 0.00             | 0.00              | 48.01            | 55.13            |
|        | -130.8     | 133.8      | -115.6     | 134.4      | -171.3                                               | -65.0                                                           | 2.26             | 2.42              | 1.06             | 0.93             |
|        | -114.9     | 137.1      | -133.2     | 118.4      | -168.9                                               | -174.2                                                          | 1.91             | 1.99              | 1.91             | 1.93             |
|        | -107.2     | 123.2      | -140.2     | -82.6      | -61.3                                                | -172.1                                                          | 3.70             | 3.79              | 0.09             | 0.09             |
|        | -116.3     | 123.2      | -111.6     | 138.4      | -60.1                                                | -66.0                                                           | 0.25             | 0.42              | 31.36            | 27.23            |
|        | -121.6     | 156.4      | -111.0     | -128.7     | 59.6                                                 | -63.2                                                           | 5.05             | 5.38              | 0.01             | 0.01             |
|        | -114.3     | 153.4      | -137.6     | -84.7      | 63.5                                                 | -167.6                                                          | 4.39             | 4.37              | 0.03             | 0.03             |
|        | -107.1     | 155.8      | -107.5     | 135.6      | 65.2                                                 | -64.3                                                           | 1.09             | 1.25              | 7.65             | 6.66             |
| -105.8 | 157.1      | -136.1     | 118.2      | 65.3       | -174.4                                               | 1.07                                                            | 1.27             | 7.85              | 6.51             |                  |

## 2. Additional figures

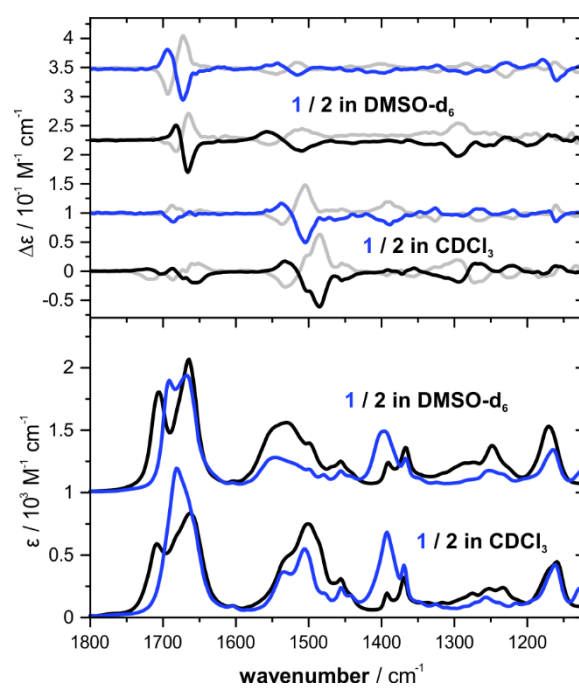

**Fig. S1.** Comparison of the experimental IR and VCD spectra of **1** and **2** recorded in  $\text{CDCl}_3$  and  $\text{DMSO-d}_6$ .

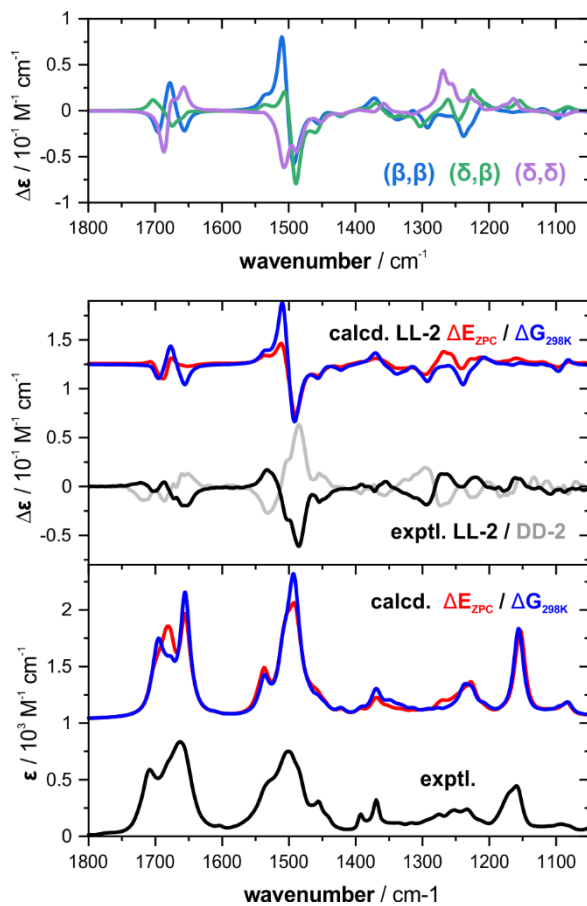

**Fig. S2.** Spectra of the ( $\beta,\beta$ )-, ( $\delta,\beta$ )- and ( $\delta,\delta$ )- conformer families of LL-2 compared to those simulated based on  $\Delta E_{ZPC}$ - and  $\Delta G_{298K}$ . For the  $\Delta G_{298K}$ -based VCD, the increased contribution of the ( $\beta,\beta$ )-family and the decrease in population of the ( $\delta,\delta$ )-family can be noted in the amide III region, where it leads to a worse match than the DEZPC-based spectrum.

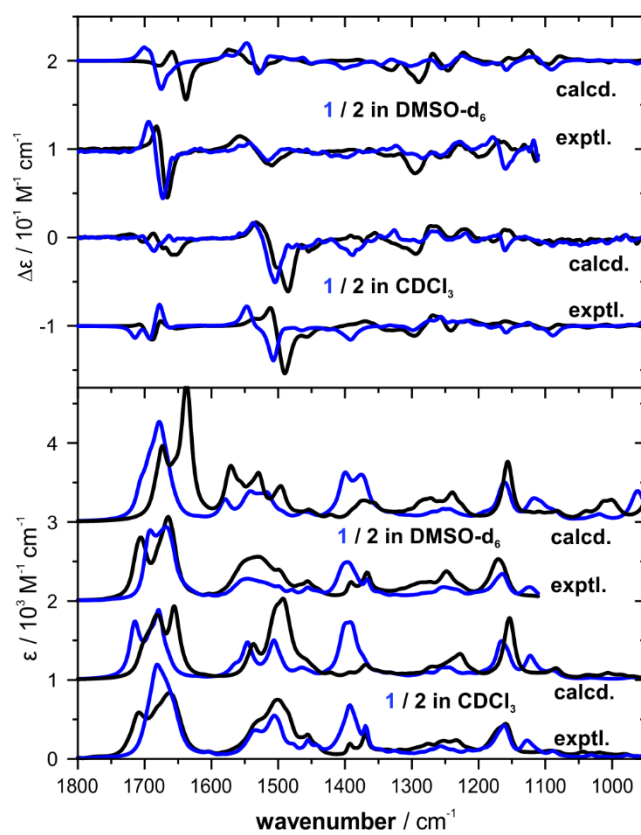

**Fig. S3** Comparison of experimental IR and VCD spectra of **1** and **2** recorded in  $\text{CDCl}_3$  and  $\text{DMSO-d}_6$  with the corresponding computed spectra.

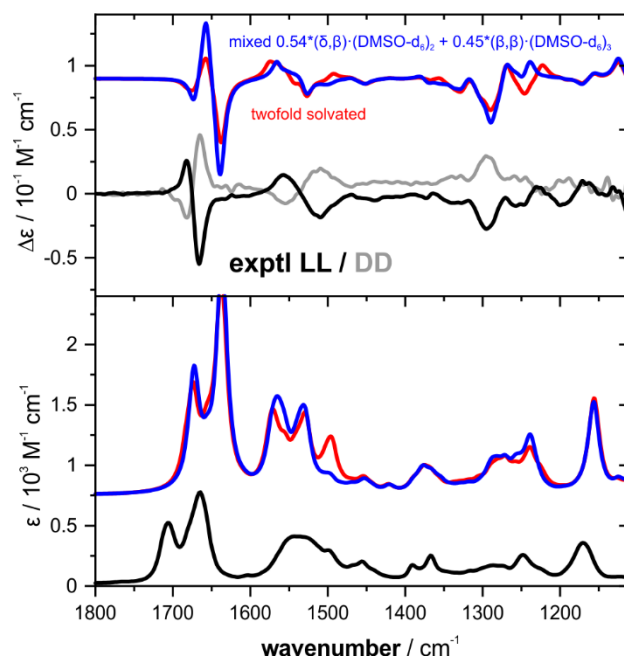

**Fig. S4.** Comparison of the twofold solvated **2** and the mixed spectrum generated through the shown formula.



### 3. Cartesian coordinates of selected structures

#### ( $\beta,\beta$ )-LL-2

|   |             |             |             |
|---|-------------|-------------|-------------|
| C | -2.13597800 | -0.46305800 | 0.00453200  |
| H | -2.22141200 | -0.37346400 | 1.09015700  |
| C | -3.10979400 | -1.52088400 | -0.53093000 |
| N | -4.22637700 | -1.72421400 | 0.19087200  |
| H | -4.38263400 | -1.15900600 | 1.01170700  |
| C | -5.28451900 | -2.62397800 | -0.24723900 |
| H | -4.87783500 | -3.61887700 | -0.44446000 |
| H | -6.03111100 | -2.69289100 | 0.54472600  |
| H | -5.76287500 | -2.25717500 | -1.16108800 |
| O | -2.86392800 | -2.12666400 | -1.57543700 |
| N | -0.79407500 | -0.92905900 | -0.30090400 |
| H | -0.70696000 | -1.51103800 | -1.12495400 |
| C | 0.28858400  | -0.61205700 | 0.44046900  |
| O | 0.23233600  | 0.12181600  | 1.42742900  |
| C | 1.60762300  | -1.26525700 | -0.00743700 |
| H | 1.67535000  | -1.21779200 | -1.09801700 |
| N | 2.70862200  | -0.48501400 | 0.52496300  |
| H | 2.53645100  | -0.03146700 | 1.41311100  |
| C | 3.64347400  | 0.09432300  | -0.28292400 |
| O | 3.79271600  | -0.16164700 | -1.46725700 |
| O | 4.38287600  | 0.96488600  | 0.43745500  |
| C | 5.50939900  | 1.71075300  | -0.15727700 |
| C | 6.02523300  | 2.52823300  | 1.02885800  |
| H | 6.87562700  | 3.14110000  | 0.71566000  |
| H | 5.24299700  | 3.19059100  | 1.41183900  |
| H | 6.35210000  | 1.87046100  | 1.83995000  |
| C | 5.00216400  | 2.63504800  | -1.26706800 |
| H | 5.82186700  | 3.27875500  | -1.60286500 |
| H | 4.63231600  | 2.06765000  | -2.12186100 |
| H | 4.19894300  | 3.27718500  | -0.89143200 |
| C | 6.58541100  | 0.73975300  | -0.64966300 |
| H | 6.23589300  | 0.15317000  | -1.50005200 |
| H | 7.46980200  | 1.30785700  | -0.95648500 |
| H | 6.88252000  | 0.05899000  | 0.15466300  |
| C | -2.40210900 | 0.92912700  | -0.64095400 |
| H | -1.57240000 | 1.57265600  | -0.33265100 |
| H | -2.34573500 | 0.81750600  | -1.72843600 |
| C | 1.66495000  | -2.76548700 | 0.41290300  |
| H | 0.76850100  | -3.23455200 | -0.01339000 |
| C | 2.89175000  | -3.45173300 | -0.20165500 |
| H | 2.89519500  | -3.36745900 | -1.29328800 |
| H | 3.81998900  | -3.00800100 | 0.17393000  |
| H | 2.89960000  | -4.51581500 | 0.05735900  |
| C | 1.62606400  | -2.95702600 | 1.93510600  |
| H | 0.73270000  | -2.51304600 | 2.38557400  |
| H | 1.62989400  | -4.02432500 | 2.17919400  |
| H | 2.50421900  | -2.50540100 | 2.41020100  |
| C | -3.71749700 | 1.55935000  | -0.24242400 |
| C | -3.87604400 | 2.13149000  | 1.02823500  |
| C | -4.80382200 | 1.58628900  | -1.12569800 |
| C | -5.08946100 | 2.70598900  | 1.40839800  |
| H | -3.03893100 | 2.13729700  | 1.72128800  |
| C | -6.01889300 | 2.16329500  | -0.75083000 |
| H | -4.69655200 | 1.15637600  | -2.11767900 |
| C | -6.16654400 | 2.72256900  | 0.51922600  |
| H | -5.19056400 | 3.14831900  | 2.39463900  |
| H | -6.84693400 | 2.17857300  | -1.45271600 |
| H | -7.10914800 | 3.17426200  | 0.81156600  |

#### ( $\delta,\beta$ )-LL-2

|   |             |            |            |
|---|-------------|------------|------------|
| C | -1.73217200 | 0.02645000 | 0.32538400 |
| H | -2.08306100 | 0.36312000 | 1.30435100 |

|   |             |             |             |
|---|-------------|-------------|-------------|
| C | -1.73640900 | -1.50494100 | 0.24262500  |
| N | -2.58639700 | -2.14447500 | 1.06585200  |
| H | -3.17322600 | -1.59855000 | 1.67798500  |
| C | -2.76083400 | -3.58975300 | 1.03632600  |
| H | -1.80696400 | -4.09400900 | 1.21242300  |
| H | -3.46395500 | -3.86986200 | 1.82135100  |
| H | -3.15348000 | -3.91851100 | 0.06900500  |
| O | -1.00352600 | -2.09241400 | -0.55491500 |
| N | -0.35534700 | 0.46041900  | 0.17247600  |
| H | 0.26937700  | -0.15539000 | -0.33247700 |
| C | 0.13151100  | 1.57985600  | 0.74487900  |
| O | -0.56061600 | 2.35086400  | 1.41039400  |
| C | 1.63575100  | 1.86134700  | 0.55319800  |
| H | 2.05772400  | 1.80480500  | 1.56109500  |
| N | 2.32432600  | 0.85142800  | -0.23381300 |
| H | 2.37681600  | 0.96124700  | -1.23628000 |
| C | 3.21096900  | -0.03238500 | 0.32122000  |
| O | 3.37021600  | -0.18282700 | 1.52022600  |
| O | 3.84969100  | -0.70194500 | -0.65845000 |
| C | 4.82772000  | -1.77210800 | -0.36372300 |
| C | 5.24231800  | -2.23137500 | -1.76268700 |
| H | 5.98137400  | -3.03414300 | -1.68515500 |
| H | 4.37861100  | -2.60838000 | -2.31857800 |
| H | 5.68668000  | -1.40535300 | -2.32631900 |
| C | 4.14743600  | -2.91139200 | 0.39836700  |
| H | 4.84359300  | -3.75234800 | 0.48218100  |
| H | 3.85281100  | -2.60260300 | 1.40202300  |
| H | 3.26085000  | -3.25745900 | -0.14233100 |
| C | 6.02561100  | -1.19245400 | 0.39191600  |
| H | 5.74410300  | -0.85787400 | 1.39105600  |
| H | 6.79843500  | -1.96234900 | 0.48605600  |
| H | 6.45358600  | -0.34872600 | -0.15901500 |
| C | -2.63895300 | 0.65052400  | -0.77582900 |
| H | -2.45329500 | 1.72876000  | -0.75111700 |
| H | -2.29956300 | 0.27887700  | -1.74792300 |
| C | 1.86157700  | 3.29926400  | 0.01707600  |
| H | 1.25998400  | 3.93795000  | 0.67153600  |
| C | 3.33126600  | 3.71676600  | 0.15371400  |
| H | 3.67457700  | 3.63376600  | 1.19051800  |
| H | 3.98685400  | 3.09703500  | -0.46886600 |
| H | 3.46161400  | 4.75698400  | -0.16268500 |
| C | 1.35380200  | 3.49040800  | -1.42046000 |
| H | 0.30222100  | 3.20332000  | -1.52522700 |
| H | 1.44024000  | 4.54223500  | -1.71121600 |
| H | 1.93903300  | 2.91342600  | -2.14779600 |
| C | -4.11502400 | 0.37902100  | -0.59244200 |
| C | -4.85194100 | 1.07888700  | 0.37403400  |
| C | -4.77855200 | -0.57383600 | -1.37524200 |
| C | -6.21184300 | 0.82709600  | 0.55860000  |
| H | -4.35854300 | 1.83414700  | 0.98002200  |
| C | -6.14013300 | -0.82693300 | -1.19625600 |
| H | -4.22590900 | -1.11953000 | -2.13497400 |
| C | -6.86086800 | -0.12881200 | -0.22630100 |
| H | -6.76569400 | 1.38286100  | 1.30890700  |
| H | -6.63652000 | -1.56635100 | -1.81708500 |
| H | -7.91986700 | -0.32190300 | -0.08751200 |

**( $\delta,\delta$ )-LL-2**

|   |            |             |            |
|---|------------|-------------|------------|
| C | 2.07914200 | -1.59798400 | 0.54339600 |
| H | 2.23803300 | -2.63092500 | 0.86510100 |
| C | 2.42609100 | -0.74114100 | 1.78142400 |
| N | 1.43420000 | -0.03698800 | 2.35333900 |
| H | 0.49407500 | -0.07861600 | 1.97681100 |
| C | 1.65487500 | 0.74557300  | 3.55936100 |
| H | 2.40028900 | 1.52811200  | 3.38729400 |
| H | 0.71001300 | 1.20800100  | 3.84788300 |

|   |             |             |             |
|---|-------------|-------------|-------------|
| H | 2.00865200  | 0.11112900  | 4.37804900  |
| O | 3.58081100  | -0.74601200 | 2.21292100  |
| N | 0.69192100  | -1.49950200 | 0.12875100  |
| H | 0.41095200  | -0.72492600 | -0.45786600 |
| C | -0.27125100 | -2.35794800 | 0.53842500  |
| O | -0.04920500 | -3.34943200 | 1.22764800  |
| C | -1.71776000 | -2.03381400 | 0.12139300  |
| H | -2.27804600 | -2.09208000 | 1.06105100  |
| N | -1.88493700 | -0.69529400 | -0.43501200 |
| H | -2.30470900 | -0.59636800 | -1.34787900 |
| C | -1.93865100 | 0.40640100  | 0.37297000  |
| O | -1.56417000 | 0.40099400  | 1.53804400  |
| O | -2.42326500 | 1.45784400  | -0.30351000 |
| C | -2.52206100 | 2.81007800  | 0.30012300  |
| C | -3.09261000 | 3.63867300  | -0.85148700 |
| H | -3.22150800 | 4.67650400  | -0.53111300 |
| H | -2.41723600 | 3.62364400  | -1.71210500 |
| H | -4.06630800 | 3.24987200  | -1.16423900 |
| C | -1.13183000 | 3.31285100  | 0.69199600  |
| H | -1.20454800 | 4.36168700  | 0.99722300  |
| H | -0.71579600 | 2.74025700  | 1.52165300  |
| H | -0.44758300 | 3.25502800  | -0.16018900 |
| C | -3.49336700 | 2.78075100  | 1.48148400  |
| H | -3.09897400 | 2.19195200  | 2.31051800  |
| H | -3.66347700 | 3.80421800  | 1.83093100  |
| H | -4.45756500 | 2.36329600  | 1.17452900  |
| C | 3.04817200  | -1.31353700 | -0.63064100 |
| H | 4.06120100  | -1.39084900 | -0.22836200 |
| H | 2.92002100  | -2.11580000 | -1.36364900 |
| C | -2.27315200 | -3.12705600 | -0.82607300 |
| H | -2.04132700 | -4.06707800 | -0.31478800 |
| C | -1.57994200 | -3.15564600 | -2.19706700 |
| H | -0.49493200 | -3.26471800 | -2.10244300 |
| H | -1.94942700 | -4.00350300 | -2.78226300 |
| H | -1.77785000 | -2.25087600 | -2.78472400 |
| C | -3.79962400 | -3.03254300 | -0.96355700 |
| H | -4.28839500 | -3.04518600 | 0.01638000  |
| H | -4.11525200 | -2.12118000 | -1.48495000 |
| H | -4.17773800 | -3.88271300 | -1.54038100 |
| C | 2.85381200  | 0.02820200  | -1.30593200 |
| C | 2.10855900  | 0.13283200  | -2.48840600 |
| C | 3.41638400  | 1.19620500  | -0.76909200 |
| C | 1.91984700  | 1.36744600  | -3.11441200 |
| H | 1.68588300  | -0.76383200 | -2.93377800 |
| C | 3.23008100  | 2.43075000  | -1.39118000 |
| H | 4.01097500  | 1.13306700  | 0.13706500  |
| C | 2.47902100  | 2.52166700  | -2.56553300 |
| H | 1.34485300  | 1.42350500  | -4.03360900 |
| H | 3.67933900  | 3.32152700  | -0.96299800 |
| H | 2.34033100  | 3.48162700  | -3.05267600 |
